# Supplementary material for: KLIFS: an overhaul after the first 5 years of supporting kinase research
Source: PubMed Central journal article supplement (PMC7778968; doi:10.1093/nar/gkaa895), 2020-10-21
Supplement: gkaa895_supplemental_file.pdf [file gkaa895_supplemental_file.pdf]

## Supplementary information

for

### **KLIFS: an overhaul after the first 5 years of supporting kinase research**

Georgi K. Kanev<sup>1,2</sup>, Chris de Graaf<sup>3</sup>, Bart A. Westerman<sup>2</sup>, Iwan J.P. de Esch<sup>1</sup>, Albert J. Kooistra<sup>4,\*</sup>

<sup>1</sup> Division of Medicinal Chemistry, Amsterdam Institute for Molecules, Medicines and Systems (AIMMS), Vrije Universiteit Amsterdam, De Boelelaan 1108, 1081 HZ Amsterdam, The Netherlands

<sup>2</sup> Department of Neurosurgery, Amsterdam University Medical Centers, Cancer Center Amsterdam, Brain Tumor Center Amsterdam, De Boelelaan 1117, 1081 HV Amsterdam, The Netherlands

<sup>3</sup> Sosei Heptares, Steinmetz Building, Granta Park, Great Abington, Cambridge, CB21 6DG, UK

<sup>4</sup> Department of Drug Design and Pharmacology, University of Copenhagen, Universitetsparken 2, 2100 Copenhagen, Denmark

\* To whom correspondence should be addressed. Tel: +45 35328305 Email: [albert.kooistra@sund.ku.dk](mailto:albert.kooistra@sund.ku.dk)

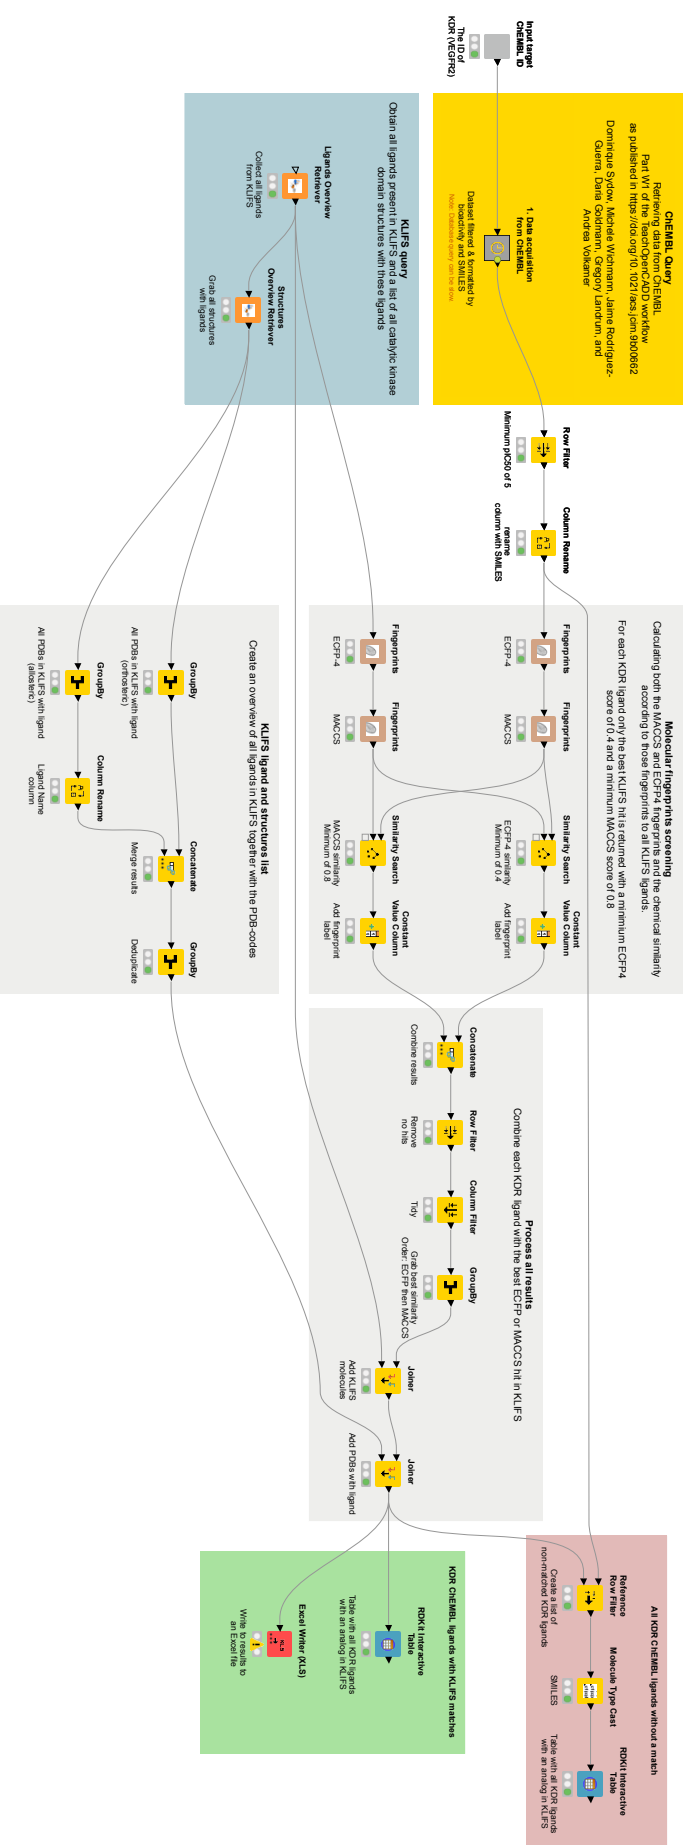

**Figure S1.** A KNIME workflow utilizing the KLFIS platform to identify analogs within KLFIS for every compound in a compound library in KLFIS. The workflow starts with collecting all KDR (VEGFR2) inhibitors with a pIC50 value  $\geq 5$  from CHEMBL, followed by a fingerprint similarity analysis (both MACCS and ECFP-4) against all KLFIS ligands as collected by the KLFIS KNIME nodes. All compounds having a (close) analog in KLFIS, defined by a Tanimoto similarity of 0.4 for ECFP-4 and 0.8 for MACCS, are linked to the best hit in KLFIS together with a list of PDB-codes in which the ligand is present. The remaining compounds for which no (close) analog was identified are shown in an interactive table. The KNIME workflow can be downloaded at <https://github.com/3D-e-Chem/workflows>
